# Supplementary material for: Structures and energetics of low-index stoichiometric BiPO4surfaces
Source: Royal Society of Chemistry journal article supplement (doi:10.1039/c9ce00810a), 2019-01-01
Supplement: c9ce00810a1.pdf [file c9ce00810a1.pdf]

## Supplementary Information (SI)

### Structure and Energetics of Low-index Stoichiometric BiPO<sub>4</sub> Surfaces

Yuan Xu,<sup>a</sup> Xinguo Ma,<sup>\*,a</sup> Jisong Hu,<sup>a</sup> Ang Xu,<sup>b</sup> Zhuoran Wang,<sup>c</sup> Chuyun Huang<sup>\*,a</sup>

<sup>a</sup> School of Science and Hubei Collaborative Innovation Center for High-efficiency Utilization of Solar Energy, Hubei University of Technology, Wuhan 430068, China;

<sup>b</sup> State Grid Wuhan Dongxihu District Electric Power Supply Company, Wuhan 430040, China.

<sup>c</sup> School of Optical and Electronic Information, Huazhong University of Science and Technology, Wuhan 430074, China.

E-mail: maxg2013@sohu.com (X.G. Ma); chuyunh@163.com (C.Y. Huang)

#### 1. Corrected surface energy

Here, we proposed a new scheme to correct the average surface energies and to obtain a more precise result by the relation of the surface energies between fixed two lateral faces and fixed one lateral faces. The relation can be expressed as

$$E_{\text{surf}/(\text{rel-top})} + E_{\text{surf}/(\text{fix-bot})} = 2E_{\text{surf}/(\text{fix-1Face})} \quad (\text{S1})$$

$$E_{\text{surf}/(\text{fix-top})} + E_{\text{surf}/(\text{fix-bot})} = 2E_{\text{surf}/(\text{fix-2Face})} \quad (\text{S2})$$

$$E_{\text{surf}/(\text{fix-top})} = E_{\text{surf}/(\text{fix-bot})} \quad (\text{S3})$$

where  $E_{\text{surf}/(\text{rel-top})}$  and  $E_{\text{surf}/(\text{fix-bot})}$  represent the surface energies for the relaxed top lateral face and the unrelaxed bottom lateral face, respectively, when only the top lateral face is permitted to optimize in the formula S1. For the formula S2,  $E_{\text{surf}/(\text{fix-top})}$  and  $E_{\text{surf}/(\text{fix-bot})}$  are the surface energies for the top lateral face and the bottom lateral face, respectively, when both of two lateral faces are fixed. It is easy to understand that  $E_{\text{surf}/(\text{fix-top})}$  is equal to  $E_{\text{surf}/(\text{fix-bot})}$ , due to their same situations when two lateral faces are fixed, namely, the same surface dangling bond and the fixation of two lateral faces. Lastly, according to formula S1, S2, and S3, the corrected surface energy for the relaxed top lateral face can be obtained as follow:

$$E_{\text{surf}/(\text{rel-top})} = 2E_{\text{surf}/(\text{fix-1Face})} - E_{\text{surf}/(\text{fix-2Face})} \quad (\text{S4})$$

Of course, the  $E_{\text{surf}/(\text{fix-1Face})}$  and  $E_{\text{surf}/(\text{fix-2Face})}$  can be gained by the average surface energy

$$E_{\text{surf}} = (E_{\text{slab}} - NE_{\text{bulk}}) / 2S.$$

## 2. Crystal structure of bulk BiPO<sub>4</sub>

**Table S1.** Lattice constants of monazite BiPO<sub>4</sub>. Ref. 10 and 40 are for the experimental data.

| a(Å)  | b(Å)  | c(Å)  | β(°)   |           |
|-------|-------|-------|--------|-----------|
| 6.763 | 6.952 | 6.482 | 103.74 | Ref. 10   |
| 6.752 | 6.912 | 6.470 | 103.64 | Ref. 40   |
| 6.845 | 7.083 | 6.487 | 104.26 | This work |

**Table S2.** Ball and stick structures of two PO<sub>4</sub> tetrahedrons and BiO<sub>n</sub> polyhedra.

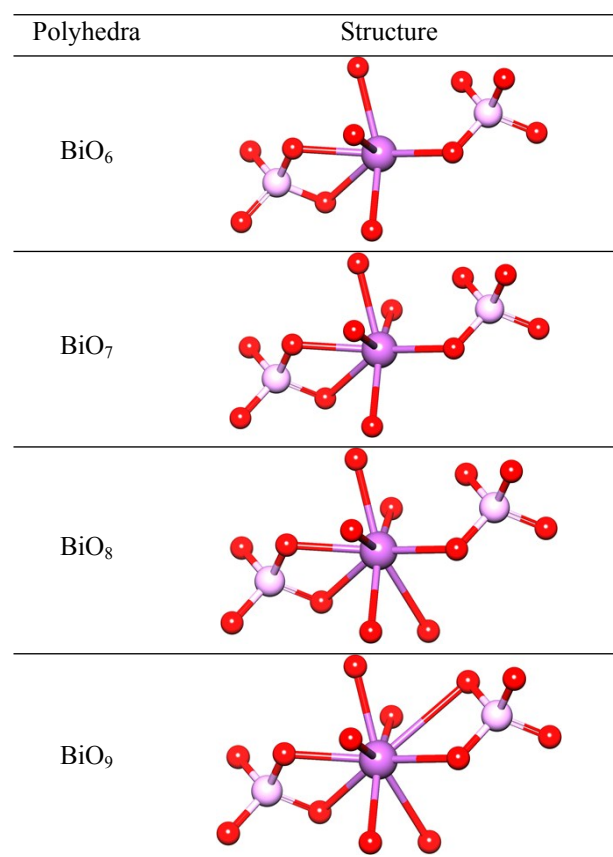

In Fig. 1, four type of oxygen atoms exist in the PO<sub>4</sub> tetrahedron, which are marked by “a” to “d”. Likewise, subscripts from “A” to “I”, indicate the type of oxygen atoms in BiO<sub>9</sub> polyhedra. The PO<sub>4</sub> and BiO<sub>n</sub> are combined into a chain structure along c-axis which are pick up from the supercells of the bulk structure of BiPO<sub>4</sub>. Two edges of one BiO<sub>9</sub> polyhedra shares four O atoms with two adjacent PO<sub>4</sub> units to form a linear chain of alternate PO<sub>4</sub> and BiO<sub>9</sub> units, while one BiO<sub>n</sub> (where n=6, 7, 8) polyhedra shares three O atoms with two adjacent PO<sub>4</sub> units to make a linear chain [1–4].

### Reference

- [1] S.N. Achary, D. Errandonea, A. Muñoz, Experimental and theoretical investigations on the polymorphism and metastability of BiPO<sub>4</sub>, Dalton Trans. 42 (2013) 14999–15015.
- [2] R.C.L. Mooney-Slater, Polymorphic forms of bismuth phosphate. Zeitschrift für Kristallographie-Crystalline Materials. 117 (1962) 371–385.
- [3] C.S. Pan, Y.F. Zhu, A review of BiPO<sub>4</sub>, a highly efficient oxyacid-type photocatalyst, used for environmental applications, Catal. Sci. Technol. 5 (2015) 3071–3083.
- [4] L. Zhu, X.G. Ma, Y. Wei, L. Chu, H. H. Wang, C.Y. Huang, Origin of photocatalytic activity of BiPO<sub>4</sub>: the first-principles calculations, Chinese J. Struc. Chem. 8 (2017) 1299–1306.

**Table S3.** Bond lengths and bond angles of monazite BiPO<sub>4</sub> in PO<sub>4</sub> tetrahedron and BiO<sub>6</sub> polyhedra.

| Label             | Bond length (Å) | Label                              | Bond angle (°) |
|-------------------|-----------------|------------------------------------|----------------|
| P–O <sub>a</sub>  | 1.526           | ∠O <sub>a</sub> -P-O <sub>b</sub>  | 115.988        |
| P–O <sub>b</sub>  | 1.529           | ∠O <sub>a</sub> -P-O <sub>c</sub>  | 113.917        |
| P–O <sub>c</sub>  | 1.543           | ∠O <sub>b</sub> -P-O <sub>c</sub>  | 105.527        |
| P–O <sub>d</sub>  | 1.560           | ∠O <sub>c</sub> -P-O <sub>d</sub>  | 110.502        |
| Bi–O <sub>A</sub> | 2.353           | ∠O <sub>A</sub> -Bi-O <sub>B</sub> | 70.214         |
| Bi–O <sub>B</sub> | 2.382           | ∠O <sub>B</sub> -Bi-O <sub>C</sub> | 85.252         |
| Bi–O <sub>C</sub> | 2.397           | ∠O <sub>C</sub> -Bi-O <sub>D</sub> | 81.564         |
| Bi–O <sub>D</sub> | 2.417           | ∠O <sub>D</sub> -Bi-O <sub>E</sub> | 99.526         |
| Bi–O <sub>E</sub> | 2.449           | ∠O <sub>E</sub> -Bi-O <sub>F</sub> | 112.375        |
| Bi–O <sub>F</sub> | 2.555           | ∠O <sub>A</sub> -Bi-O <sub>F</sub> | 121.891        |

**Table S4.** Bond lengths of monazite BiPO<sub>4</sub> in PO<sub>4</sub> tetrahedron and BiO<sub>9</sub> polyhedra. The lengths of P–O bonds are mostly around 1.5 Å without apparent fluctuation. In contrast, the bond length of Bi–O has a range from 2.35 Å to 3.02 Å. The longer the bond length, the less force between atoms, which results in the weak mutual influence between atoms.

| PO <sub>4</sub>  | Bond length (Å) | BiO <sub>9</sub>  | Bond length (Å) |
|------------------|-----------------|-------------------|-----------------|
| P–O <sub>a</sub> | 1.526           | Bi–O <sub>A</sub> | 2.353           |
| P–O <sub>b</sub> | 1.529           | Bi–O <sub>B</sub> | 2.382           |
| P–O <sub>c</sub> | 1.543           | Bi–O <sub>C</sub> | 2.397           |
| P–O <sub>d</sub> | 1.560           | Bi–O <sub>D</sub> | 2.417           |
|                  |                 | Bi–O <sub>E</sub> | 2.449           |
|                  |                 | Bi–O <sub>F</sub> | 2.555           |
|                  |                 | Bi–O <sub>G</sub> | 2.653           |
|                  |                 | Bi–O <sub>H</sub> | 2.750           |
|                  |                 | Bi–O <sub>I</sub> | 3.020           |

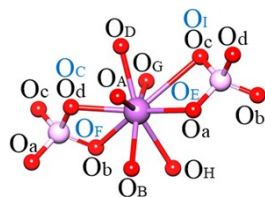

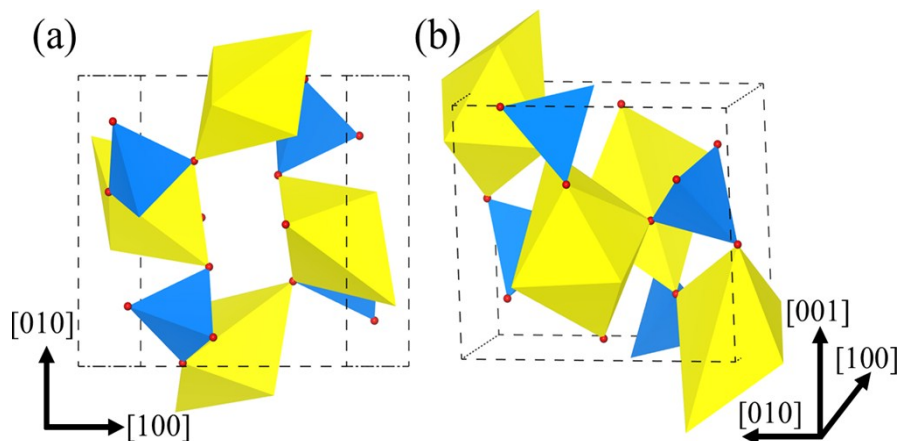

**Fig. S1.** Polyhedral model of monoclinic monazite  $\text{BiPO}_4$  along (a)  $[001]$  direction and (b)  $[100]$  direction. The yellow octahedron and blue tetrahedra represent  $\text{BiO}_6$  and  $\text{PO}_4$ , respectively.

**Table S5.** Supercell structures of monazite  $\text{BiPO}_4$  along x-, y- and z-axis, respectively. Bi and P atoms are alternately arranged along the z-axis while P and Bi atoms form two single main chains along x-axis and y-axis, which exhibit the characteristics of a layered structure for monazite  $\text{BiPO}_4$ .

| Supercell             | Side view | Top view |
|-----------------------|-----------|----------|
| $4 \times 1 \times 1$ |           |          |
| $1 \times 4 \times 1$ |           |          |
| $1 \times 1 \times 4$ |           |          |

### 3. All possible termination surfaces

**Table S6.** Total energies and their convergences of possible stoichiometric terminations of four surface structures.

| Surface | Type | Slice | Structure                                                                           | $E_{\text{slab}}$ (eV) | Convergence (eV/atom)  |
|---------|------|-------|-------------------------------------------------------------------------------------|------------------------|------------------------|
| 001     | A    | 0.063 | 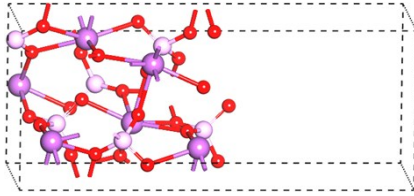   | -12480.958             | $3.010 \times 10^{-4}$ |
|         | B    | 0.169 |    | -12482.250             | $7.759 \times 10^{-6}$ |
|         | C    | 0.252 |   | -12484.738             | $4.726 \times 10^{-3}$ |
|         | D    | 0.358 |  | -12482.052             | $3.140 \times 10^{-4}$ |
|         | E    | 0.487 |  | -12483.870             | $4.013 \times 10^{-2}$ |
| 010     | A    | 0.252 |  | -12484.680             | $2.269 \times 10^{-2}$ |
|         | B    | 0.325 |  | -12480.817             | $3.751 \times 10^{-2}$ |

|     |   |       |                                                                                     |            |                         |
|-----|---|-------|-------------------------------------------------------------------------------------|------------|-------------------------|
|     | C | 0.492 | 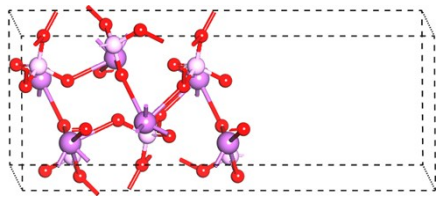   | -12490.205 | $7.294 \times 10^{-5}$  |
| 011 | A | 0.390 |    | -16605.130 | $-7.216 \times 10^{-6}$ |
|     | B | 0.957 |   | -16620.611 | $1.485 \times 10^{-4}$  |
| 100 | A | 0.084 |  | -12487.316 | $2.452 \times 10^{-6}$  |
|     | B | 0.204 |  | -12481.703 | $4.600 \times 10^{-5}$  |
|     | C | 0.459 |  | -12487.339 | $7.517 \times 10^{-6}$  |
|     | D | 0.500 |  | -12489.852 | $1.065 \times 10^{-5}$  |

#### 4. Incomplete PO<sub>4</sub> tetrahedron along (001) plane

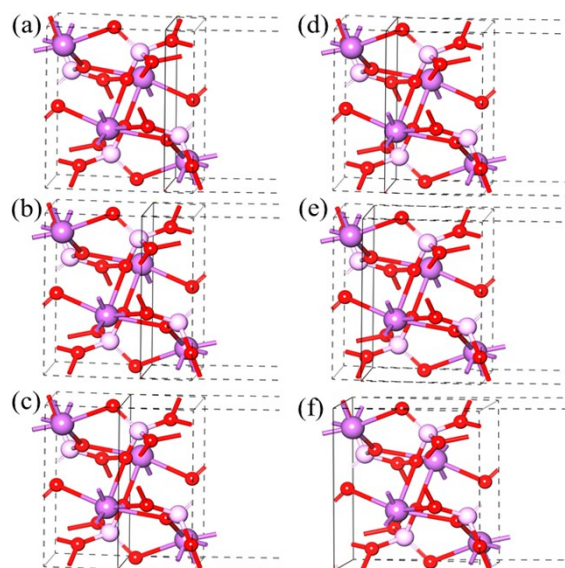

**Fig. S2.** All possible slices with incomplete PO<sub>4</sub> tetrahedrons along the (001) plane. Here, panels (a)-(f) show the six possible slices at the points 0.2, 0.35, 0.5, 0.65, 0.8, 1.0 along (001) plane, respectively. It can be found that keeping intact PO<sub>4</sub> tetrahedrons in the stoichiometric (001) surface is impossible.

#### 5. Surface structure parameters

**Table S7.** The structure parameters of the (001) surface before and after relaxation. Atom labels refer to Fig. 1(c) and Fig. 2(b).

| Atom                              | Unrelaxed      |                |                | Relaxed        |                |                | d/ Å  |
|-----------------------------------|----------------|----------------|----------------|----------------|----------------|----------------|-------|
|                                   | X <sub>1</sub> | Y <sub>1</sub> | Z <sub>1</sub> | X <sub>2</sub> | Y <sub>2</sub> | Z <sub>2</sub> |       |
| O <sub>(1)</sub>                  | 0.800          | 2.845          | 8.745          | 0.915          | 2.953          | 8.742          | 0.158 |
| O <sub>(2)</sub>                  | 1.284          | 5.605          | 8.853          | 1.375          | 5.811          | 9.241          | 0.448 |
| Bi                                | 6.051          | 4.509          | 8.155          | 6.170          | 4.272          | 8.167          | 0.265 |
| P                                 | 2.661          | 5.903          | 8.260          | 2.420          | 5.83           | 8.226          | 0.254 |
| Bond                              | Length/ Å      |                | Length/ Å      |                | Δ/ Å           | Ratio (%)      |       |
| Bi-O                              | 2.382          |                | 2.255          |                | -              | -5.33          |       |
| P-O <sub>a</sub>                  | 1.526          |                | 1.491          |                | -              | -2.29          |       |
| P-O <sub>b</sub>                  | 1.529          |                | 1.457          |                | -              | -4.71          |       |
| P-O <sub>c</sub>                  | 1.543          |                | 1.485          |                | -              | -3.76          |       |
| Angle                             | /°             |                | /°             |                | Δ/ °           | Ratio (%)      |       |
| ∠O <sub>a</sub> -P-O <sub>c</sub> | 106.89         |                | 114.65         |                | 7.76           | 7.26           |       |
| ∠O <sub>b</sub> -P-O <sub>c</sub> | 113.08         |                | 123.70         |                | 10.62          | 9.39           |       |

|                           |        |        |      |      |
|---------------------------|--------|--------|------|------|
| $\angle O_a\text{-P-O}_b$ | 115.09 | 121.64 | 6.55 | 5.69 |
|---------------------------|--------|--------|------|------|

**Table S8.** The structure parameters of the (010) surface before and after relaxation. Atom labels refer to Fig. 1(c) and Fig. 3(b).

| Unrelaxed                 |                |                | Relaxed        |                |                 |                |       |
|---------------------------|----------------|----------------|----------------|----------------|-----------------|----------------|-------|
| Atom                      | X <sub>1</sub> | Y <sub>1</sub> | Z <sub>1</sub> | X <sub>2</sub> | Y <sub>2</sub>  | Z <sub>2</sub> | d/ Å  |
| O <sub>(1)</sub>          | 4.437          | 2.181          | 10.365         | 4.118          | 2.181           | 10.180         | 0.369 |
| O <sub>(2)</sub>          | 0.389          | 3.547          | 9.746          | 0.170          | 3.514           | 9.798          | 0.228 |
| Bi                        | 2.214          | 2.398          | 9.486          | 1.896          | 2.315           | 9.280          | 0.388 |
| P                         | 5.558          | 2.437          | 9.295          | 5.378          | 2.438           | 9.298          | 0.180 |
| Bond                      | Length/ Å      |                | Length/ Å      |                | $\Delta$ / Å    | Ratio (%)      |       |
| Bi-O                      | 2.397          |                | 2.388          |                | -0.009          | -0.38          |       |
| P-O <sub>a</sub>          | 1.526          |                | 1.507          |                | -0.019          | -1.25          |       |
| P-O <sub>b</sub>          | 1.529          |                | 1.575          |                | 0.046           | 3.01           |       |
| P-O <sub>c</sub>          | 1.543          |                | 1.573          |                | 0.030           | 1.94           |       |
| Angle                     | $l^\circ$      |                | $l^\circ$      |                | $\Delta/^\circ$ | Ratio (%)      |       |
| $\angle O_a\text{-P-O}_c$ | 106.89         |                | 107.10         |                | 0.21            | 0.196          |       |
| $\angle O_b\text{-P-O}_c$ | 113.08         |                | 110.20         |                | -2.88           | -2.55          |       |
| $\angle O_a\text{-P-O}_b$ | 115.09         |                | 114.45         |                | -0.64           | -0.56          |       |

**Table S9.** The structure parameters of the (011) surface before and after relaxation. Atom labels refer to Fig. 1(c) and Fig. 4(b).

| Unrelaxed        |                |                | Relaxed        |                |                |                |       |
|------------------|----------------|----------------|----------------|----------------|----------------|----------------|-------|
| Atom             | X <sub>1</sub> | Y <sub>1</sub> | Z <sub>1</sub> | X <sub>2</sub> | Y <sub>2</sub> | Z <sub>2</sub> | d/ Å  |
| O <sub>(1)</sub> | 4.368          | 6.333          | 8.746          | 4.546          | 6.493          | 8.766          | 0.240 |
| O <sub>(2)</sub> | 6.706          | 5.312          | 8.746          | 6.917          | 5.141          | 8.820          | 0.282 |
| Bi               | 2.214          | 2.398          | 9.486          | 1.896          | 2.315          | 9.280          | 0.388 |
| P                | 5.558          | 2.437          | 9.295          | 5.378          | 2.438          | 9.298          | 0.180 |
| Bond             | Length/ Å      |                | Length/ Å      |                | $\Delta$ / Å   | Ratio (%)      |       |
| Bi-O             | 2.397          |                | 2.254          |                | -              | -5.97          |       |
| P-O <sub>a</sub> | 1.526          |                | 1.560          |                | 0.034          | 2.23           |       |
| P-O <sub>b</sub> | 1.529          |                | 1.536          |                | 0.007          | 0.46           |       |
| P-O <sub>c</sub> | 1.543          |                | 1.531          |                | -              | -0.78          |       |



| Angle                     | $l^\circ$ | $l^\circ$ | $\Delta/^\circ$ | Ratio (%) |
|---------------------------|-----------|-----------|-----------------|-----------|
| $\angle O_a\text{-P-O}_c$ | 106.89    | 107.35    | 0.45            | 0.42      |
| $\angle O_b\text{-P-O}_c$ | 113.08    | 114.55    | 1.47            | 1.30      |
| $\angle O_a\text{-P-O}_b$ | 115.09    | 109.30    | -5.79           | -5.03     |

**Table S10.** The structure parameters of the (100) surface before and after relaxation. Atom labels refer to Fig. 1(c) and Fig. 5(b).

| Atom                      | Unrelaxed      |                |                 | Relaxed        |                    |                | d/ Å  |
|---------------------------|----------------|----------------|-----------------|----------------|--------------------|----------------|-------|
|                           | X <sub>1</sub> | Y <sub>1</sub> | Z <sub>1</sub>  | X <sub>2</sub> | Y <sub>2</sub>     | Z <sub>2</sub> |       |
| O <sub>(1)</sub>          | 0.701          | 5.325          | 9.362           | 0.880          | 5.451              | 9.377          | 0.219 |
| O <sub>(2)</sub>          | 4.962          | 5.340          | 8.867           | 4.855          | 5.303              | 8.888          | 0.115 |
| Bi                        | 0.963          | 0.957          | 8.247           | 1.035          | 0.779              | 8.023          | 0.295 |
| P                         | 1.154          | 4.292          | 8.285           | 1.191          | 4.320              | 8.376          | 0.102 |
| Bond                      | Length/ Å      |                | Length/ Å       |                | $\Delta/ \text{Å}$ | Ratio (%)      |       |
| Bi-O                      | 2.353          |                | 2.399           |                | 0.046              | 1.96           |       |
| P-O <sub>a</sub>          | 1.526          |                | 1.525           |                | -0.001             | -0.067         |       |
| P-O <sub>b</sub>          | 1.529          |                | 1.605           |                | 0.076              | 4.97           |       |
| P-O <sub>c</sub>          | 1.543          |                | 1.526           |                | -0.017             | -1.10          |       |
| Angle                     | $l^\circ$      | $l^\circ$      | $\Delta/^\circ$ | Ratio (%)      |                    |                |       |
| $\angle O_a\text{-P-O}_c$ | 106.89         | 107.46         | 0.57            | 0.53           |                    |                |       |
| $\angle O_b\text{-P-O}_c$ | 113.08         | 110.22         | -2.86           | -2.53          |                    |                |       |
| $\angle O_a\text{-P-O}_b$ | 115.09         | 111.495        | -3.60           | -3.12          |                    |                |       |

## 6. Planar averaged charge density difference

To specifically illustrate the effect of surface relaxation, the planar-averaged electron density difference of the surface before and after relaxation is calculated along the z direction. It is defined as

$$\Delta\rho(z) = \int \rho_{\text{relaxed}}(x, y, z) dx dy - \int \rho_{\text{unrelaxed}}(x, y, z) dx dy \quad (\text{S5})$$

where  $\rho_{\text{relaxed}}(x, y, z)$  and  $\rho_{\text{unrelaxed}}(x, y, z)$  are the charge density of relaxed and unrelaxed surfaces at the (x, y, z) point, respectively. The positive values indicate electrons accumulation, while the negative values represent the depletion of electrons.

## 7. Intact PO<sub>4</sub> tetrahedron in the (100) surface

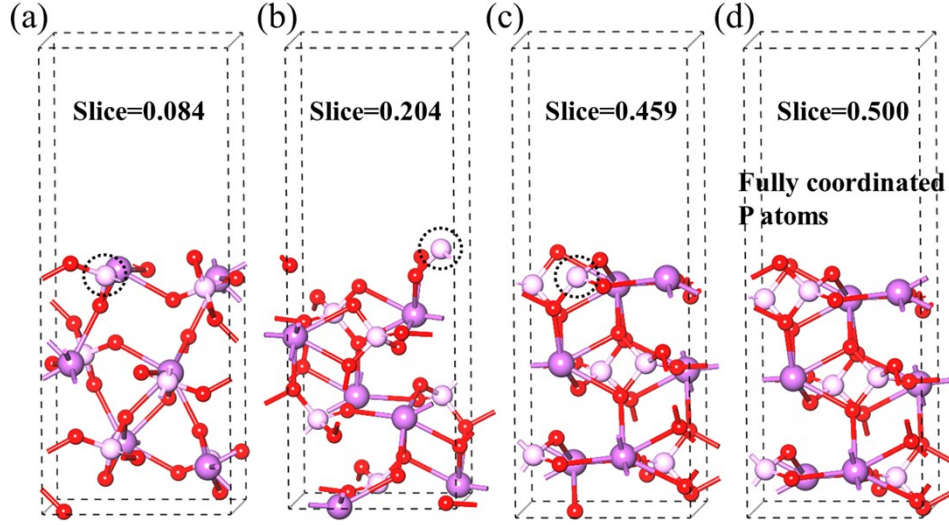

**Fig. S3.** All possible terminations along the (100) plane. Here, panels (a)-(d) show the four possible slices at the points 0.084, 0.204, 0.459 and 0.500, respectively. And only picture (d) with top 0.500 shows the intact PO<sub>4</sub> tetrahedron.

**Table S11.** The atomic displacements from the bulk-truncated ideal positions, and the expansion ratios of bond length and bond angle in the outermost layer after the relaxation of (100) surface. Here, the two slices are considered at the points 0.459 and 0.500. The corresponding atom labels are shown in Fig. 1(c) and Fig. 5(b). Among three possible terminations (see Fig. S3(a), S3(b) and S3(c) with incomplete PO<sub>4</sub> tetrahedrons in (100) surface, the termination in Fig. S3(c) is the most stable, so it is set as reference to compare with that in Fig. S3(d).

| Slice | Atom             | $\Delta x / \text{\AA}$ | $\Delta y / \text{\AA}$ | $\Delta z / \text{\AA}$ | $d / \text{\AA}$ | Bond             | Ratio /% | Angle                     | Ratio /% |
|-------|------------------|-------------------------|-------------------------|-------------------------|------------------|------------------|----------|---------------------------|----------|
| 0.459 | O <sub>(1)</sub> | 0.02                    | -0.05                   | 0.03                    | 0.06             | Bi-O             | -3.86    | $\angle O_a\text{-P-O}_c$ | 0.93     |
|       | O <sub>(2)</sub> | 0.10                    | 0.06                    | -0.06                   | 0.13             | P-O <sub>a</sub> | 1.44     | $\angle O_b\text{-P-O}_c$ | -1.95    |
|       | Bi               | 0.04                    | -0.19                   | -0.27                   | 0.33             | P-O <sub>b</sub> | 4.71     | $\angle O_a\text{-P-O}_b$ | -3.72    |
|       | P                | 0.03                    | 0.003                   | 0.1                     | 0.10             | P-O <sub>c</sub> | -0.97    | —                         | —        |
| 0.500 | O <sub>(1)</sub> | 0.18                    | 0.22                    | 0.02                    | 0.22             | Bi-O             | 1.96     | $\angle O_a\text{-P-O}_c$ | 0.53     |
|       | O <sub>(2)</sub> | -0.11                   | -0.04                   | 0.02                    | 0.12             | P-O <sub>a</sub> | -0.07    | $\angle O_b\text{-P-O}_c$ | -2.53    |
|       | Bi               | 0.07                    | -0.16                   | -0.22                   | 0.30             | P-O <sub>b</sub> | 4.97     | $\angle O_a\text{-P-O}_b$ | -3.12    |
|       | P                | 0.04                    | 0.03                    | 0.09                    | 0.10             | P-O <sub>c</sub> | -1.10    | —                         | —        |

## 8. Proportion of crystal shape area

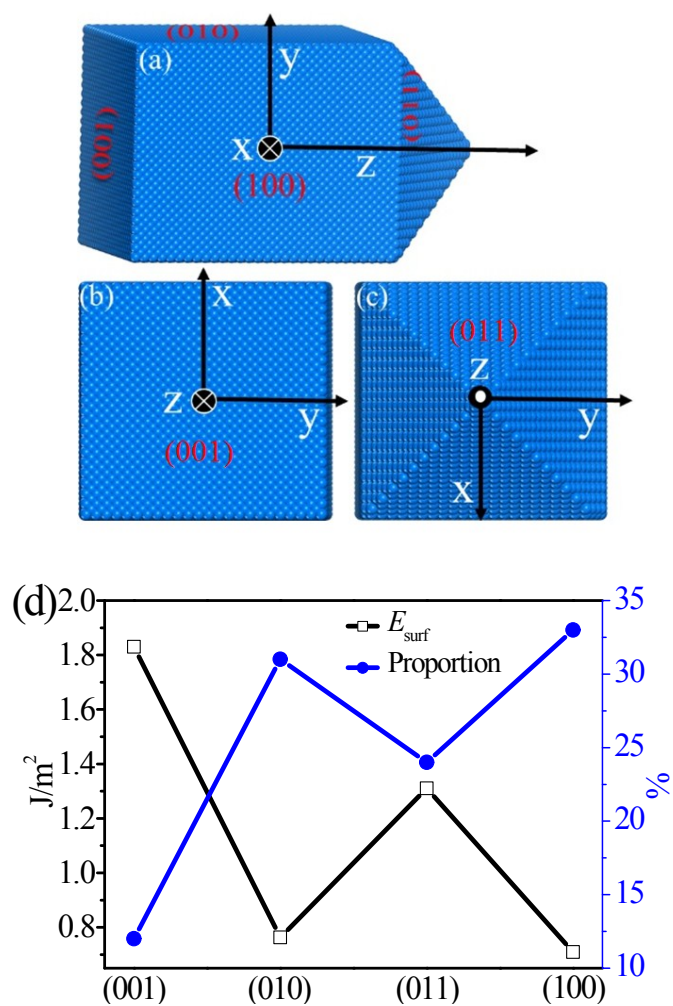

**Fig. S4.** Perspective view (a), bottom view (b), top view (c) of the equilibrium shape of BiPO<sub>4</sub> crystal in the monoclinic monazite phase, according to the Wulff construction and the average surface energies. (d) The relation between the average surface energies and the proportions of crystal shape area.
